## CORRECTION

# Correction: Expression profiling of disease progression in canine model of Duchenne muscular dystrophy

Candice Brinkmeyer-Langford, Candice Chu, Cynthia Balog-Alvarez, Xue Yu, James J. Cai, Mary Nabity, Joe N. Kornegay

[Fig 2](#) is missing panel C. Please see the complete, correct [Fig 2](#) here.

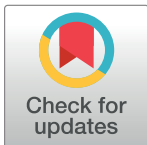

## OPEN ACCESS

**Citation:** Brinkmeyer-Langford C, Chu C, Balog-Alvarez C, Yu X, Cai JJ, Nabity M, et al. (2020) Correction: Expression profiling of disease progression in canine model of Duchenne muscular dystrophy. PLoS ONE 15(7): e0236916. <https://doi.org/10.1371/journal.pone.0236916>

**Published:** July 23, 2020

**Copyright:** © 2020 Brinkmeyer-Langford et al. This is an open access article distributed under the terms of the [Creative Commons Attribution License](#), which permits unrestricted use, distribution, and reproduction in any medium, provided the original author and source are credited.

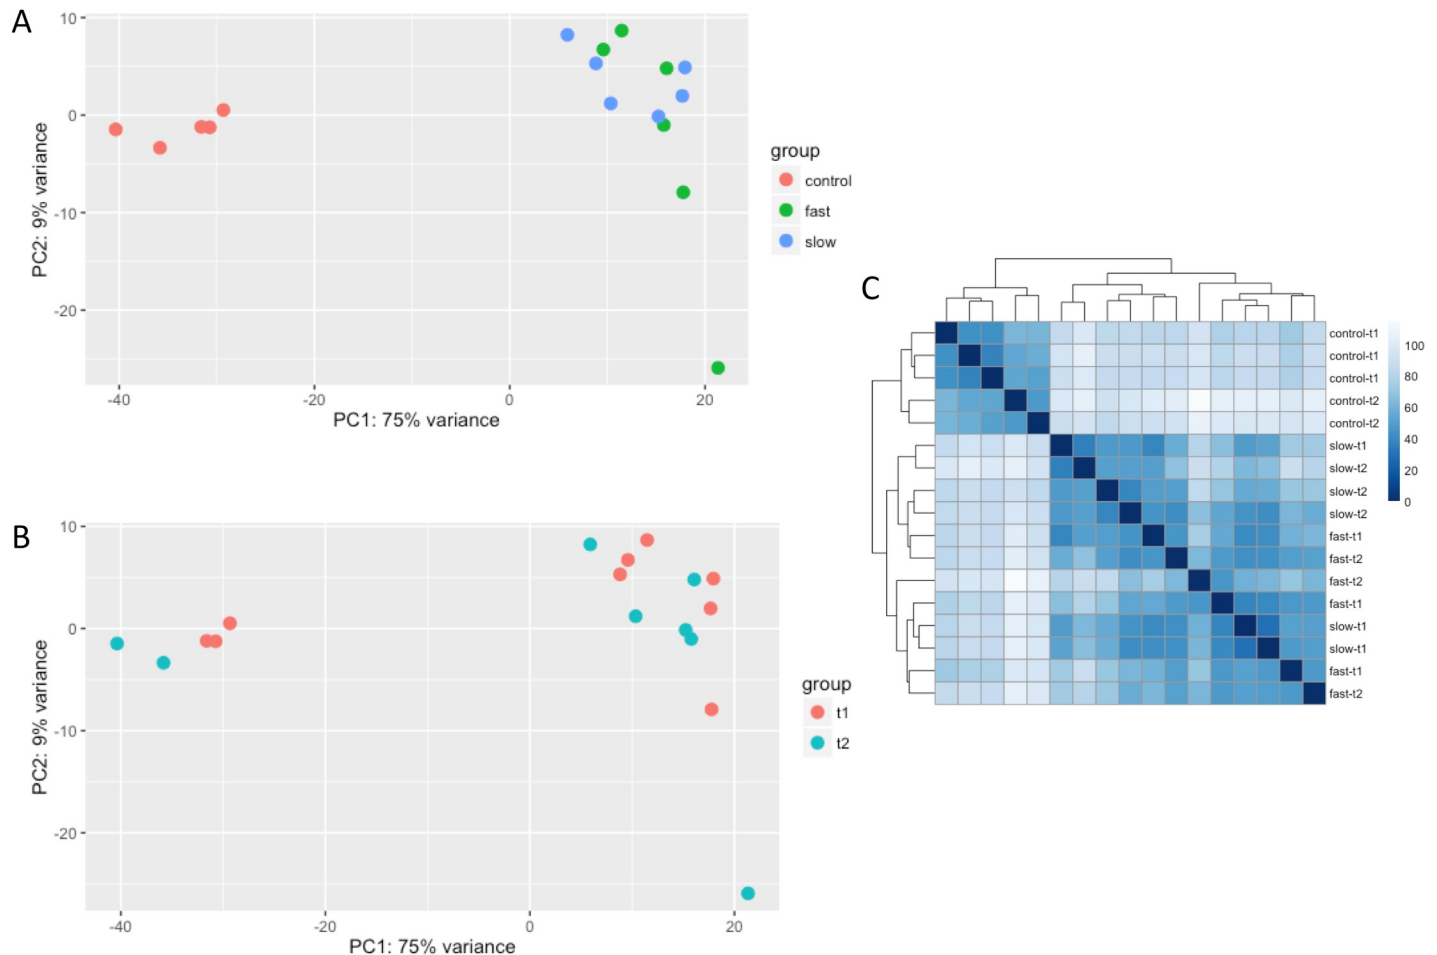

**Fig 2. Principal component and hierarchical analysis for all dogs at both time points.** Principal component 1 (PC1) and Principal component 2 (PC2) were identified by logarithm transformation in DESeq2 at two time points. 75% and 9% variance were explained by PC1 and PC2, respectively. A) shows the principal component analysis for the three groups of dogs: red circles indicate controls, green represents fast-progressing dogs, and blue represents slower-progressing dogs. B) shows the principal component analysis for the two time points: here, red circles represent T1 (age 3 months), and green circles represent T2 (age 6 months). C) is a heatmap showing sample-to-sample distances. Distance was analyzed by logarithm transformation in DESeq2.

<https://doi.org/10.1371/journal.pone.0236916.g001>

## Reference

1. Brinkmeyer-Langford C, Chu C, Balog-Alvarez C, Yu X, Cai JJ, Nabity M, et al. (2018) Expression profiling of disease progression in canine model of Duchenne muscular dystrophy. *PLoS ONE* 13(3): e0194485. <https://doi.org/10.1371/journal.pone.0194485> PMID: 29554127
